# Supplementary material for: Metabolite fingerprint analysis of cervical cancer using LC-QTOF/MS and multivariate data analysis
Source: Royal Society of Chemistry journal article supplement (doi:10.1039/c4ay00399c), 2014-01-01
Supplement: c4ay00399c1.pdf [file c4ay00399c1.pdf]

**Supplementary Table 1.** Urinary biomarkers in cervical cancer women identified by LC-QTOF/MS in positive mode.

| No. | VIP   | Rt (min) | Ion form           | Formula  | Metabolite Name      | Trend |
|-----|-------|----------|--------------------|----------|----------------------|-------|
| 1   | 12.05 | 3.37     | [M+H] <sup>+</sup> | 170.1819 | 3-Methylhistidine    | ↓     |
| 2   | 7.29  | 3.45     | [M+H] <sup>+</sup> | 193.1236 | Citric acid          | ↑     |
| 3   | 7.21  | 3.39     | [M+H] <sup>+</sup> | 112.1015 | Cytosine             | ↓     |
| 4   | 6.48  | 0.69     | [M+H] <sup>+</sup> | 176.1846 | Indoleacetic acid    | ↑     |
| 5   | 5.82  | 3.76     | [M+H] <sup>+</sup> | 196.1723 | Salicyluric acid     | ↓     |
| 6   | 5.79  | 0.89     | [M+H] <sup>+</sup> | 150.2119 | L-Methionine         | ↓     |
| 7   | 5.57  | 3.02     | [M+H] <sup>+</sup> | 120.0758 | Aminomalonic acid    | ↑     |
| 8   | 5.47  | 6.17     | [M+H] <sup>+</sup> | 133.1147 | Glutaric acid        | ↑     |
| 9   | 5.43  | 5.44     | [M+H] <sup>+</sup> | 393.5717 | Ursodeoxycholic acid | ↓     |
| 10  | 5.14  | 2.49     | [M+H] <sup>+</sup> | 175.1978 | N-Acetylorithine     | ↑     |

No. was the number of metabolites from S- and VIP-score plots constructed from the supervised OPLS-DA analysis of urine. VIP is variable importance in the project and its value of above 5.00 showing high relevance for explaining the differences of sample groups.

**Supplementary table 2.** Result from ingenuity pathway analysis with MetPA.

| No. | Pathway Name                            | Total | Expected | Hits | Raw p    | Impact  |
|-----|-----------------------------------------|-------|----------|------|----------|---------|
| 1   | Citrate cycle (TCA cycle)               | 20    | 0.083091 | 1    | 0.080196 | 0.06327 |
| 2   | Histidine metabolism                    | 44    | 0.1828   | 1    | 0.16876  | 0.0056  |
| 3   | Lysine degradation                      | 47    | 0.19526  | 1    | 0.17928  | 0.06505 |
| 4   | Fatty acid metabolism                   | 50    | 0.20773  | 1    | 0.18967  | 0       |
| 5   | Glyoxylate and dicarboxylate metabolism | 50    | 0.20773  | 1    | 0.18967  | 0.00326 |
| 6   | Cysteine and methionine metabolism      | 56    | 0.23265  | 1    | 0.2101   | 0.03806 |
| 7   | Pyrimidine metabolism                   | 60    | 0.24927  | 1    | 0.22346  | 0.02127 |
| 8   | Aminoacyl-tRNA biosynthesis             | 75    | 0.31159  | 1    | 0.27178  | 0       |
| 9   | Arginine and proline metabolism         | 77    | 0.3199   | 1    | 0.27801  | 0.00447 |
| 10  | Citrate cycle (TCA cycle)               | 20    | 0.083091 | 1    | 0.080196 | 0.06327 |

Note: Total is the total number of compounds in the pathway; the Hits is the actually matched number from the user uploaded data; the Raw p is the original p value calculated from the enrichment analysis; the Impact is the pathway impact value calculated from pathway topology analysis.
